Published by

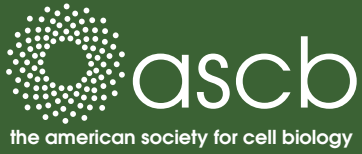

Editorial Partner

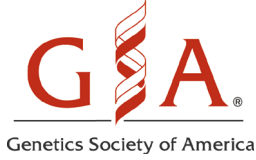

Volume 13, Fall 2014

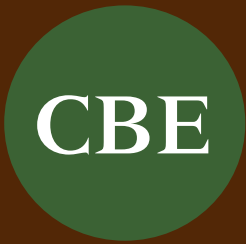

# Life Sciences Education

[www.lifescied.org](http://www.lifescied.org)

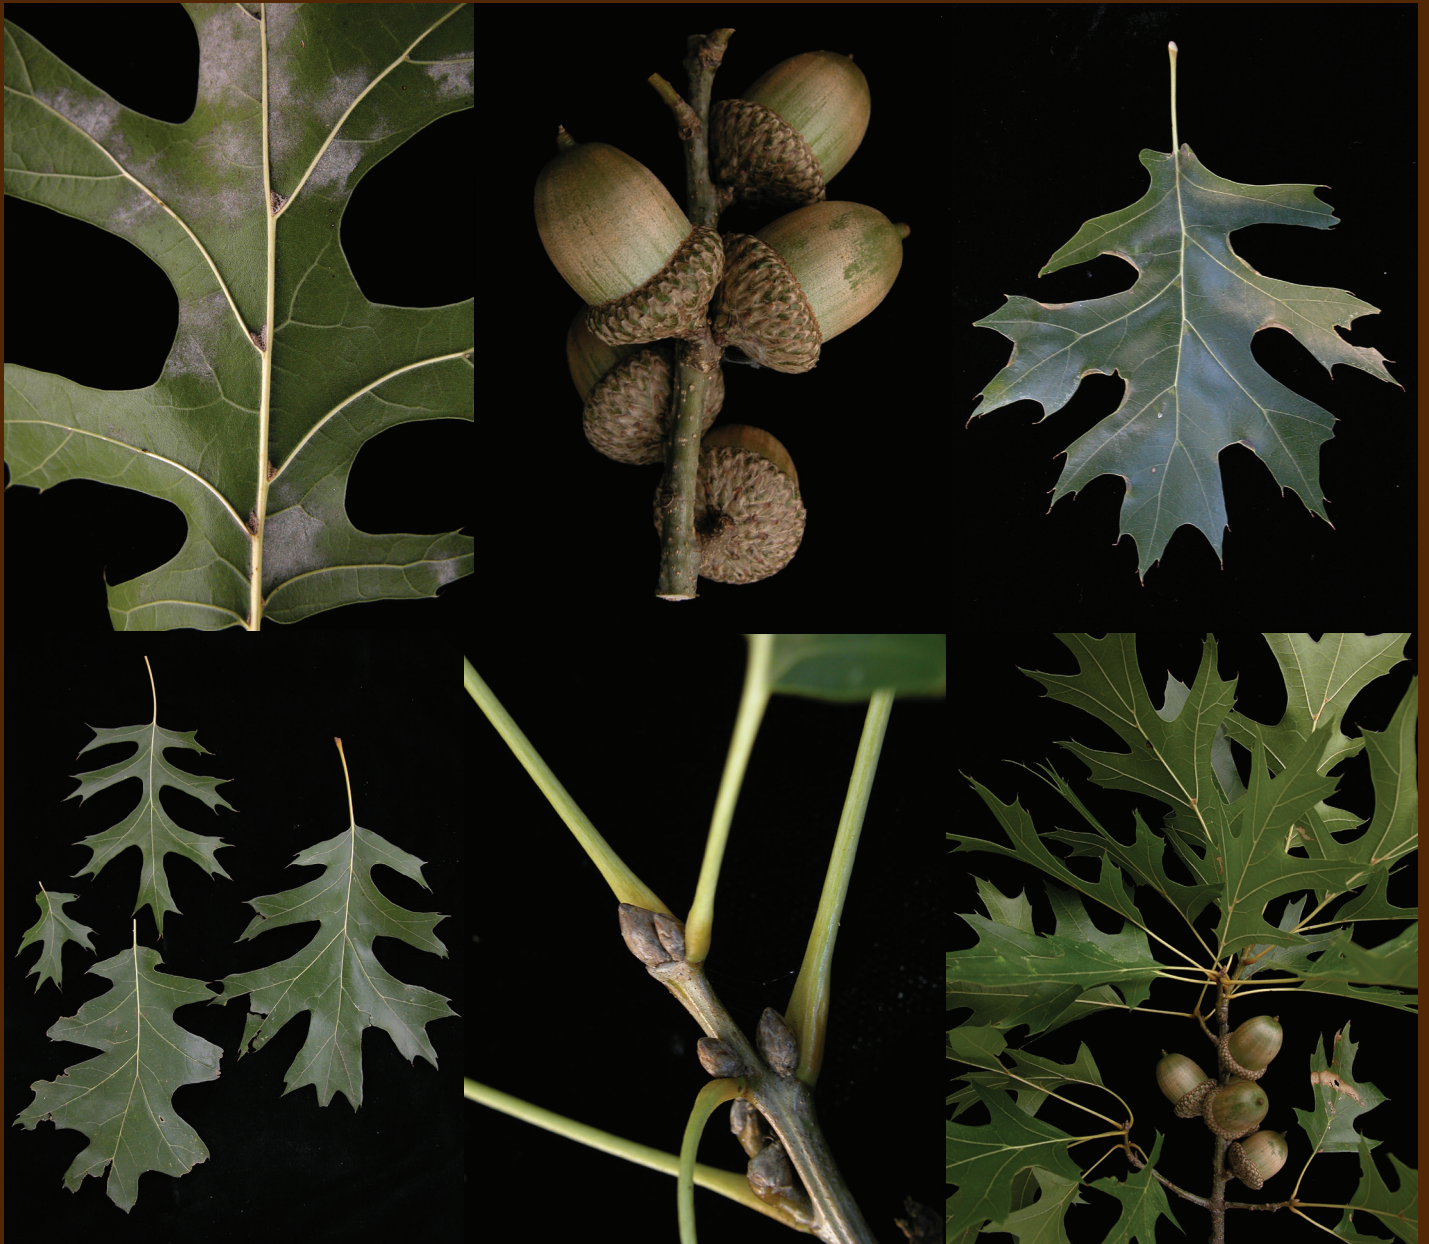

## Plant Sciences Education
